# Supplementary material for: Are stabilizing osmolytes preferentially excluded from the protein surface? FTIR and MD studies
Source: Royal Society of Chemistry journal article supplement (doi:10.1039/c5cp03065j), 2015-01-01
Supplement: c5cp03065j1.pdf [file c5cp03065j1.pdf]

## Electronic Supporting Information

# **Are stabilizing osmolytes preferentially excluded from the protein surface? FTIR and MD studies.**

*Piotr Bruździak,\* Beata Adamczak, Emilia Kaczowska, Jacek Czub, Janusz Stangret*

Department of Physical Chemistry, Gdansk University of Technology, Narutowicza 11-12., 80-233  
Gdansk, Poland

\* Corresponding Author: [piotr.bruzdziak@pg.gda.pl](mailto:piotr.bruzdziak@pg.gda.pl), Tel.: (+48 58) 347 12 38

## MD simulations – Preferential interaction coefficients for other osmolytes solutions

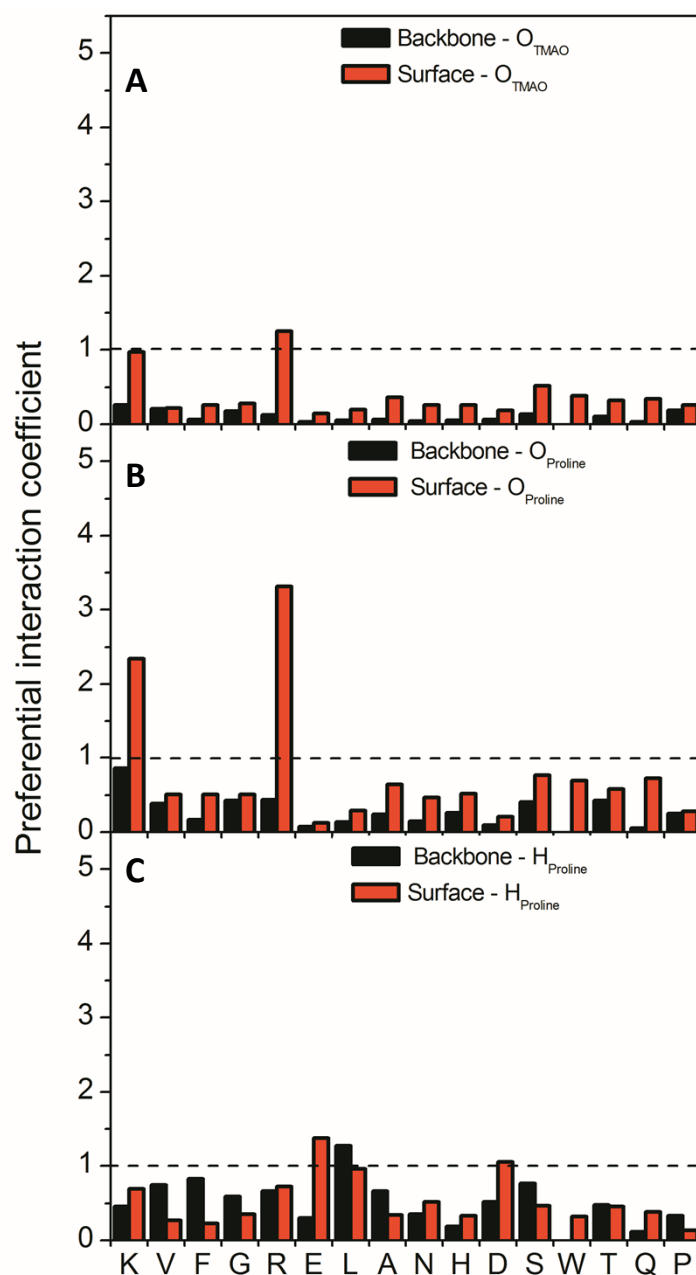

**Figure S1.** Preferential interaction coefficients calculated on the basis of interatomic distances obtained for individual amino acid residues at the surface of Lysozyme from molecular dynamics simulations for 2 M osmolyte solution: (A) Lysozyme – TMAO oxygen, (B) Lysozyme – Proline carboxylic oxygens, (C) Lysozyme – Proline amine protons. For each amino acid the coefficient was computed separately for the backbone and for the side chain surface – Equation (3)

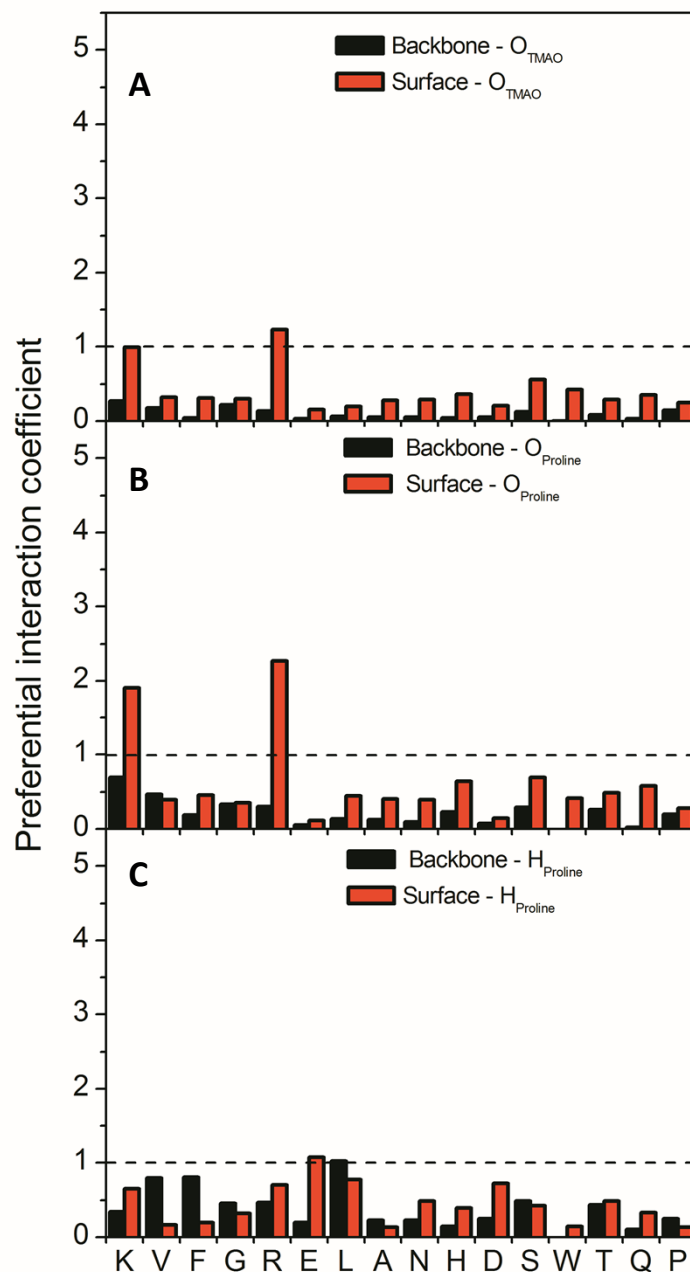

**Figure S2.** Preferential interaction coefficients calculated on the basis of interatomic distances obtained for individual amino acid residues at the surface of Lysozyme from molecular dynamics simulations for 3 M osmolyte solution: (A) Lysozyme – TMAO oxygen, (B) Lysozyme – Proline carboxylic oxygens, (C) Lysozyme – Proline amine protons. For each amino acid the coefficient was computed separately for the backbone and for the side chain surface – Equation (3)

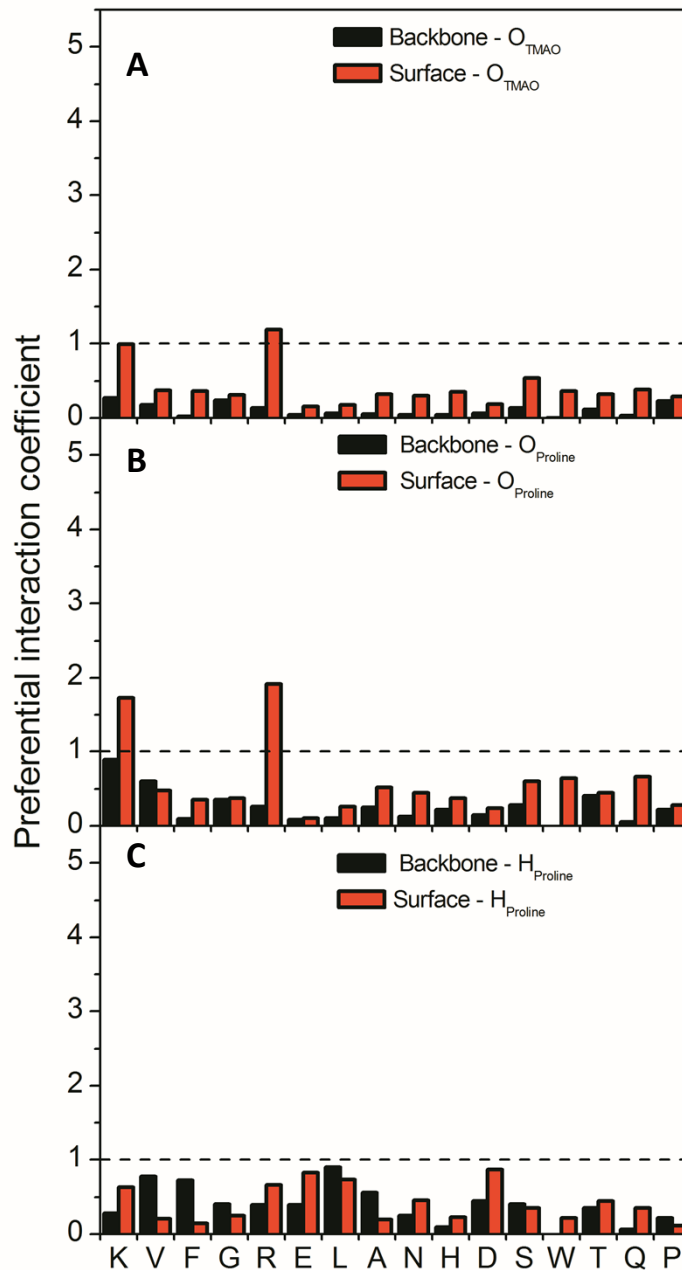

**Figure S3.** Preferential interaction coefficients calculated on the basis of interatomic distances obtained for individual amino acid residues at the surface of Lysozyme from molecular dynamics simulations for 4 M osmolyte solution: (A) Lysozyme – TMAO oxygen, (B) Lysozyme – Proline carboxylic oxygens, (C) Lysozyme – Proline amine protons. For each amino acid the coefficient was computed separately for the backbone and for the side chain surface – Equation (3)

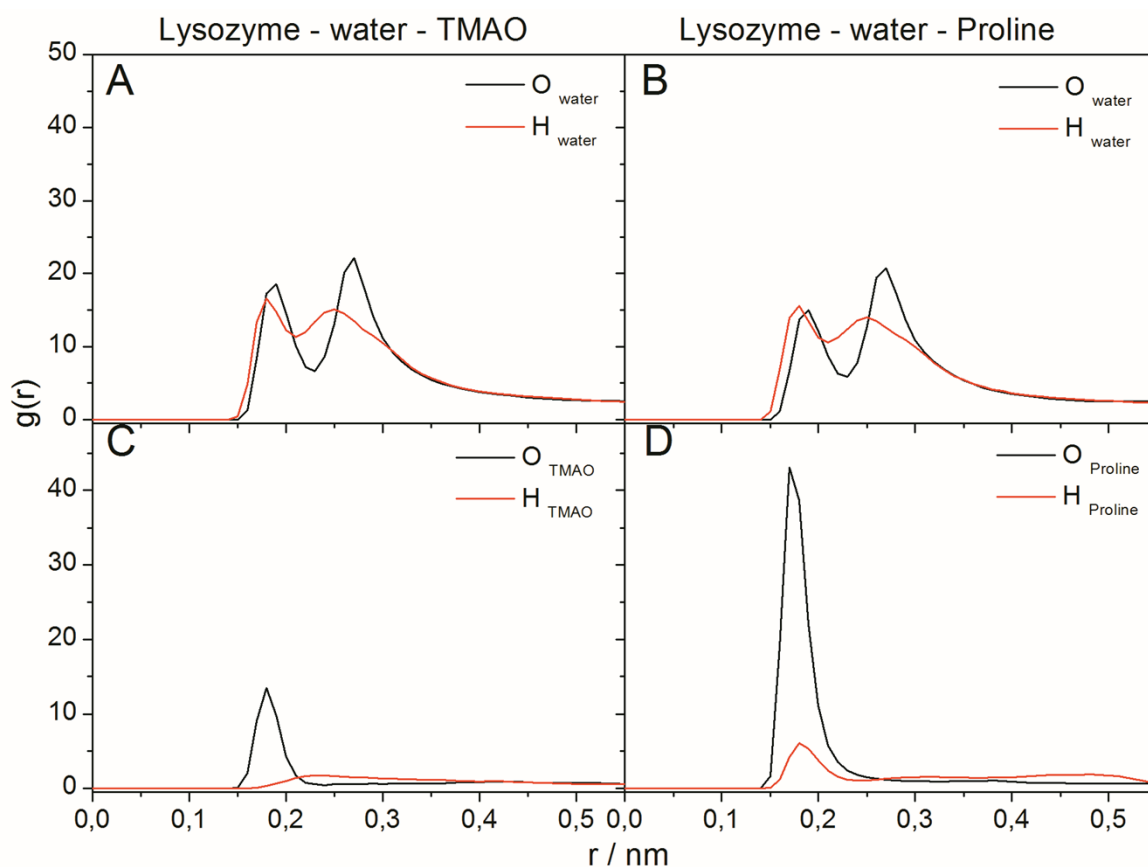

**Figure S4.** Radial distribution functions for the water molecules with respect to the surface of Lysozyme, in the 1 M TMAO (A) and 1 M Proline (B) systems. Radial distribution functions for TMAO and Proline atoms with respect to the surface of the protein, in the 1 M TMAO (C) and 1 M Proline (D) systems.
